# Supplementary material
Source: PubMed Central journal article supplement (PMC3651917)
Supplement: NIHMS423599-supplement-01.pdf [file NIHMS423599-supplement-01.pdf]

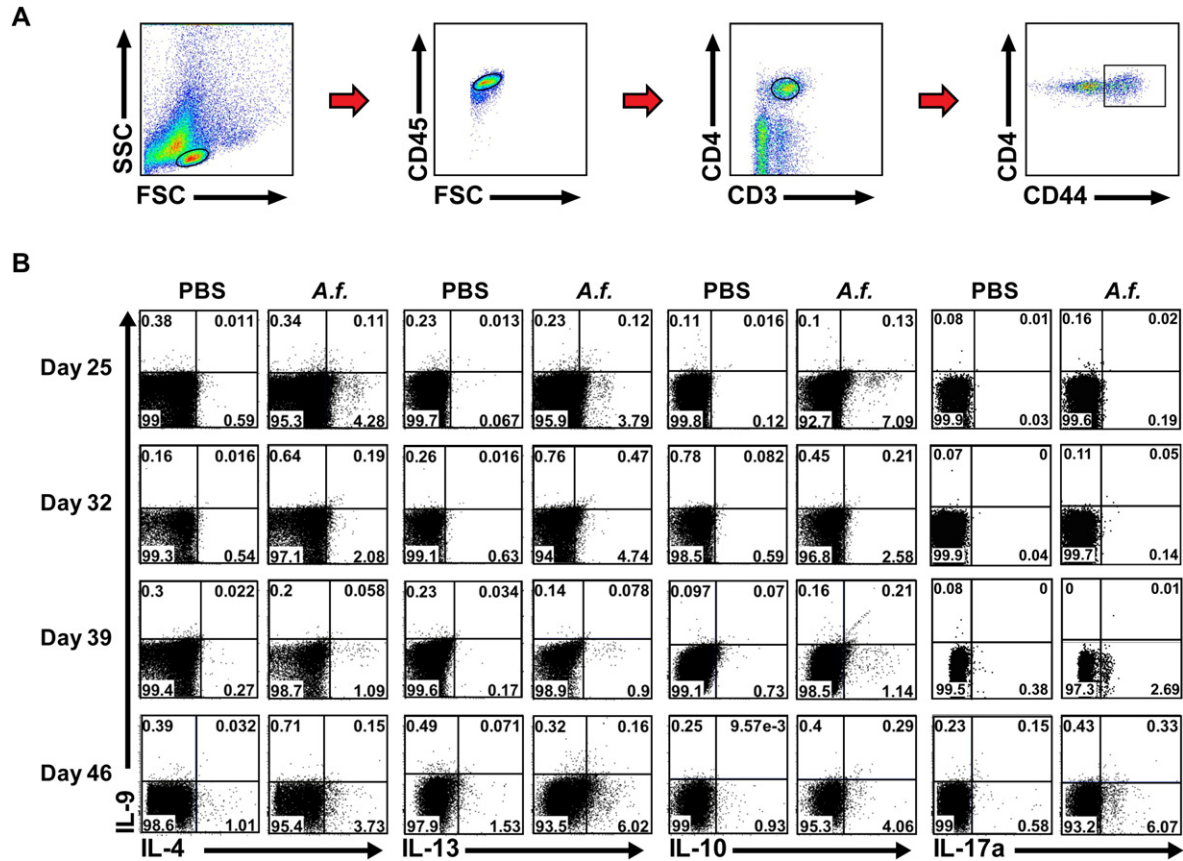

**FIG E1. A**, Gating strategy for analysis of cytokine production by effector CD4<sup>+</sup> T cells in the lungs. CD45<sup>+</sup>CD4<sup>+</sup>CD3<sup>+</sup>CD44<sup>+</sup> cells were considered CD4<sup>+</sup> Teff cells and analyzed for intracellular cytokine production in the lungs. The lymphocytes were initially selected based on forward scatter (FSC) and side scatter (SSC), followed by CD45, CD4, and CD3 gating. Finally, CD44<sup>+</sup> cells were selected as CD4<sup>+</sup> Teff cells and analyzed for the expression of cytokines. **B**, T<sub>H</sub>9 cells do not develop in the LNs after chronic exposure to *A fumigatus* (*A.f.*). A group of naive BALB/c mice were immunized intranasally for 46 days with *A fumigatus* (50 μg on weeks 1 and 2 and 20 μg on weeks 3-8 in 50 μL of saline solution) or PBS (negative control), as described in the protocol of immunization (Fig 1, A). On days 25, 32, 39, and 46, the percentage of cytokine (IL-9, IL-4, IL-13, and IL-10)-secreting Teff cells in the LNs was then assessed by means of intracellular staining gated on the CD45<sup>+</sup>CD44<sup>+</sup>CD4<sup>+</sup> population.

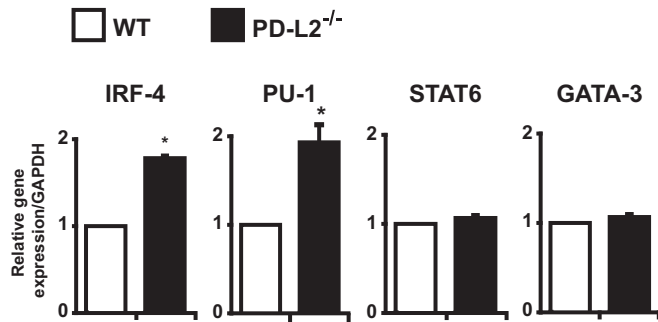

**FIG E2.** Relative gene expression of the transcription factors IRF4, PU-1, STAT6, and GATA-3 in *in vitro*-primed CD4<sup>+</sup> T cells. Purified CD4<sup>+</sup>DO11.10<sup>+</sup> T cells were put in culture ( $1 \times 10^5$  cells per well) with OVA-loaded bone marrow-derived DCs from WT and PD-L2<sup>-/-</sup> mice (1:32 ratio) in the presence of IL-4 (10 ng/mL), TGF- $\beta$  (1 ng/mL), and anti-IFN- $\gamma$  antibodies (10  $\mu$ g/mL). After 5 days of culture, relative gene expression of IRF4, PU-1, STAT6, and GATA-3 was analyzed by using quantitative real-time PCR. Data are means  $\pm$  SEMs of 3 experiments. \* $P < .05$ , WT versus PD-L2<sup>-/-</sup> mice.
